# Supplementary material for: The ciliary gene INPP5E confers dorsal telencephalic identity to human cortical organoids by negatively regulating Sonic hedgehog signaling
Source: PubMed Central journal article supplement (PMC9620745; doi:10.1016/j.celrep.2022.110811), 2022-05-17
Supplement: mmc1.pdf [file mmc1.pdf]

**Supplemental information**

**The ciliary gene *INPP5E* confers dorsal  
telencephalic identity to human cortical organoids  
by negatively regulating Sonic hedgehog signaling**

**Leah Schembs, Ariane Willems, Kerstin Hasenpusch-Theil, James D. Cooper, Katie Whiting, Karen Burr, Sunniva M.K. Bøstrand, Bhuvaneish T. Selvaraj, Siddharthan Chandran, and Thomas Theil**

**Supplemental information**

**The ciliary gene *INPP5E* confers dorsal  
telencephalic identity to human cortical organoids  
by negatively regulating sonic hedgehog signaling**

**Leah Schembs, Ariane Willems, Kerstin Hasenpusch-Theil, James D. Cooper, Katie Whiting, Karen Burr, Sunniva M.K. Bøstrand, Bhuvaneish T. Selvaraj, Siddharthan Chandran, and Thomas Theil**

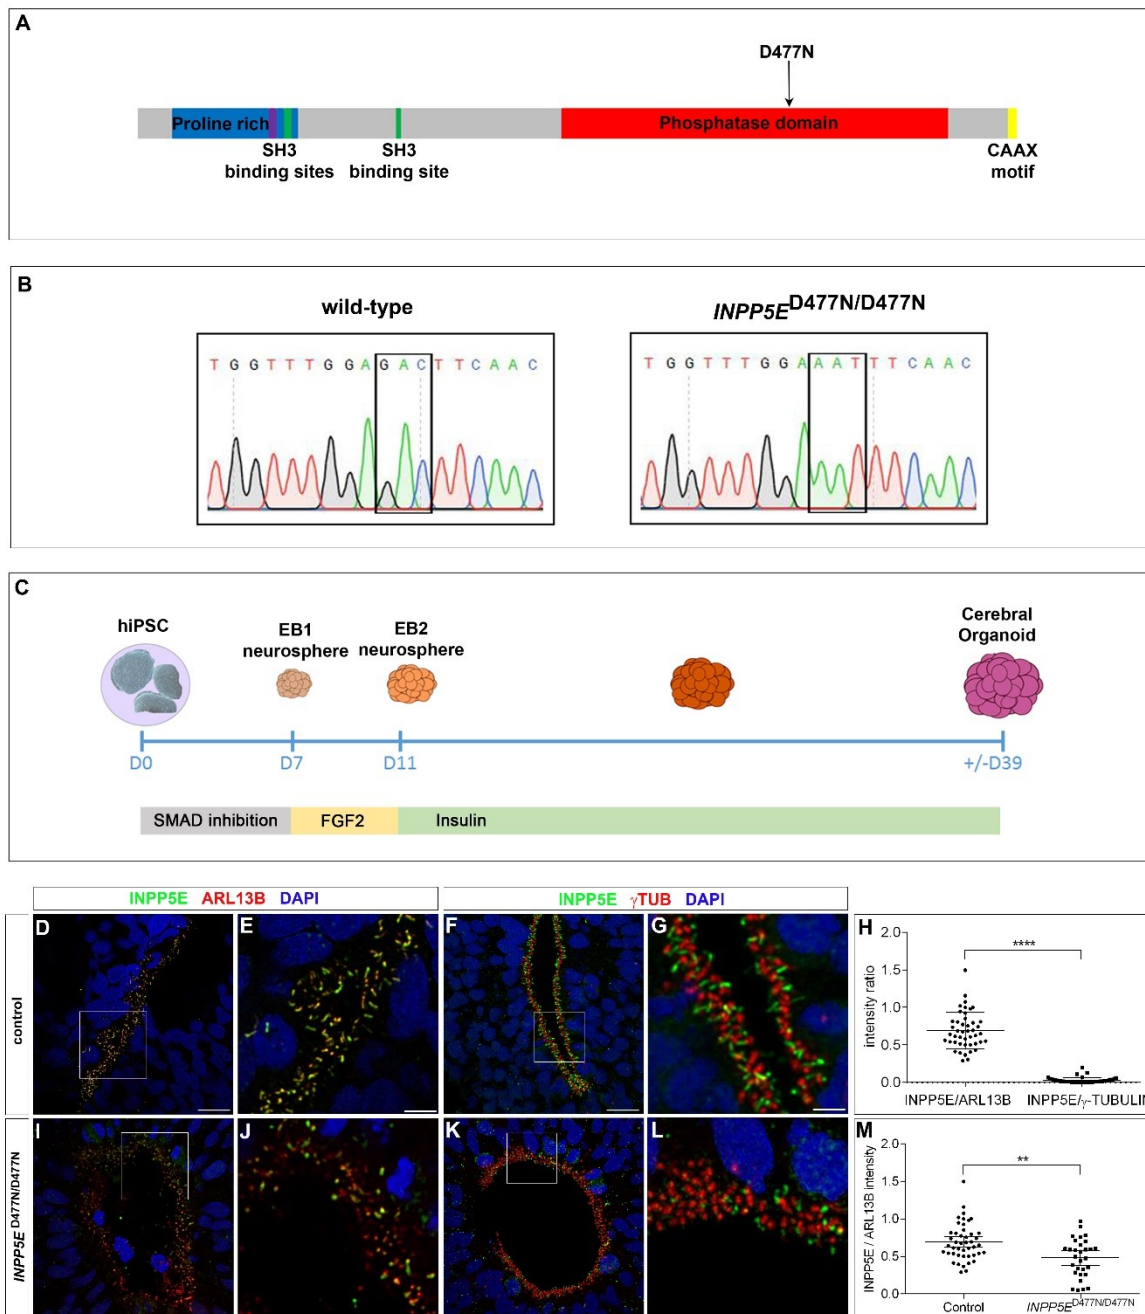

**Figure S1: *INPP5E* mutagenesis and expression in cortical organoids.** Related to Figure 1 and the STAR methods. (A) Schematic domain structure of the *INPP5E* protein, the D477N mutation is indicated. (B) Sequencing traces confirming successful mutagenesis. (C) Schematic of the protocol used to generate cortical organoids. (D-M) *INPP5E* expression in cilia of control (D-G) and in *INPP5E*<sup>D477N/D477N</sup> organoids (I-L). *INPP5E* protein was confined to the axoneme and excluded from the basal body with reduced expression levels in *INPP5E*<sup>D477N/D477N</sup> cilia. (H) Comparison of *INPP5E* expression in control lines with the axonemal and basal body markers ARL13B and  $\gamma$ TUBULIN, respectively. (M) Quantification of the *INPP5E*/ARL13B fluorescence intensity ratio in control and *INPP5E*<sup>D477N/D477N</sup> cilia. Statistical data are presented as means  $\pm$  95% confidence intervals (CI); Mann-Whitney tests; n = 45 cilia from three different lines (H); n=45 (control) and n=30 (mutant) (M); \*\* p < 0.01; \*\*\*\* p<0.0001. Scale bar: 10  $\mu$ m (E, G), 2.5  $\mu$ m (D, F).

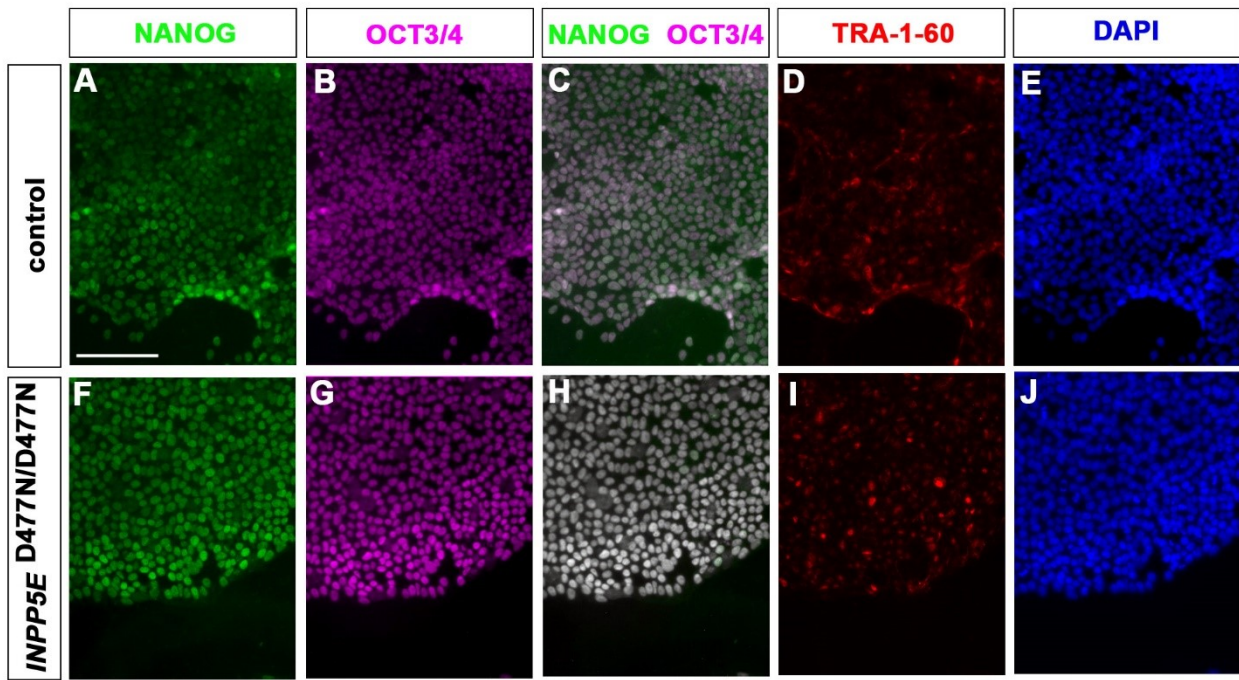

**Figure S2: Expression of pluripotency markers in control and *INPP5E*<sup>D477N/D477N</sup> iPSC lines.** Related to the STAR methods. (A-J) Immunofluorescence stainings for the indicated markers. All iPSC lines were positive for NANOG (A, C, F, H), OCT3/4 (B, C, G, H), and TRA-1-60. Scale bar: 100  $\mu$ m.

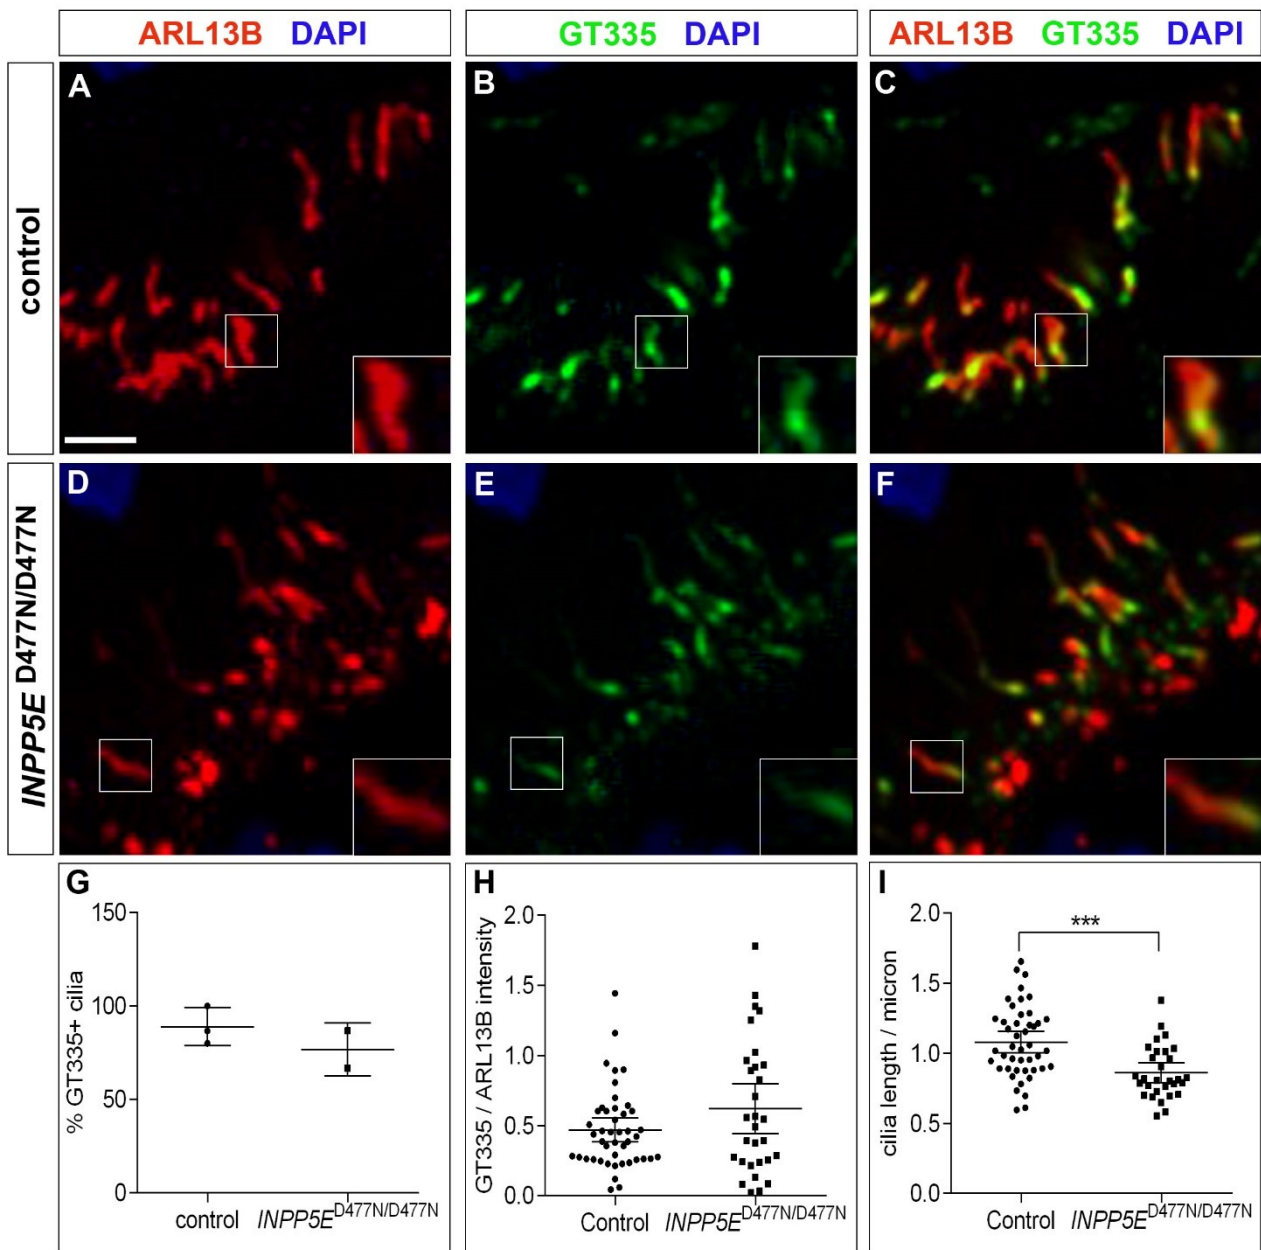

**Figure S3: Expression of glutamylated TUBULIN in control and *INPP5E*<sup>D477N/D477N</sup> organoids.** Related to Figure 2. (A-F) Immunofluorescence stainings for the indicated markers. The GT335 antibody detects glutamylated TUBULIN. The insets show higher magnification pictures of individual cilia. (G-I) Quantification of the frequency of glutamylated TUBULIN positive cilia (G), the glutamylated TUBULIN/ARL13B intensity ratio (H) and of ciliary length (I). Statistical data are presented as means  $\pm$  95% confidence intervals (CI); unpaired t-tests (G, I), and Mann Whitney test (H); n=3 (control) and n=2 (mutant) lines for (G); n = 45 (control) and n=30 (mutant) cilia from three and two different lines, respectively (H, I); \*\*\* p < 0.001;. Scale bar: 2.5  $\mu$ m.

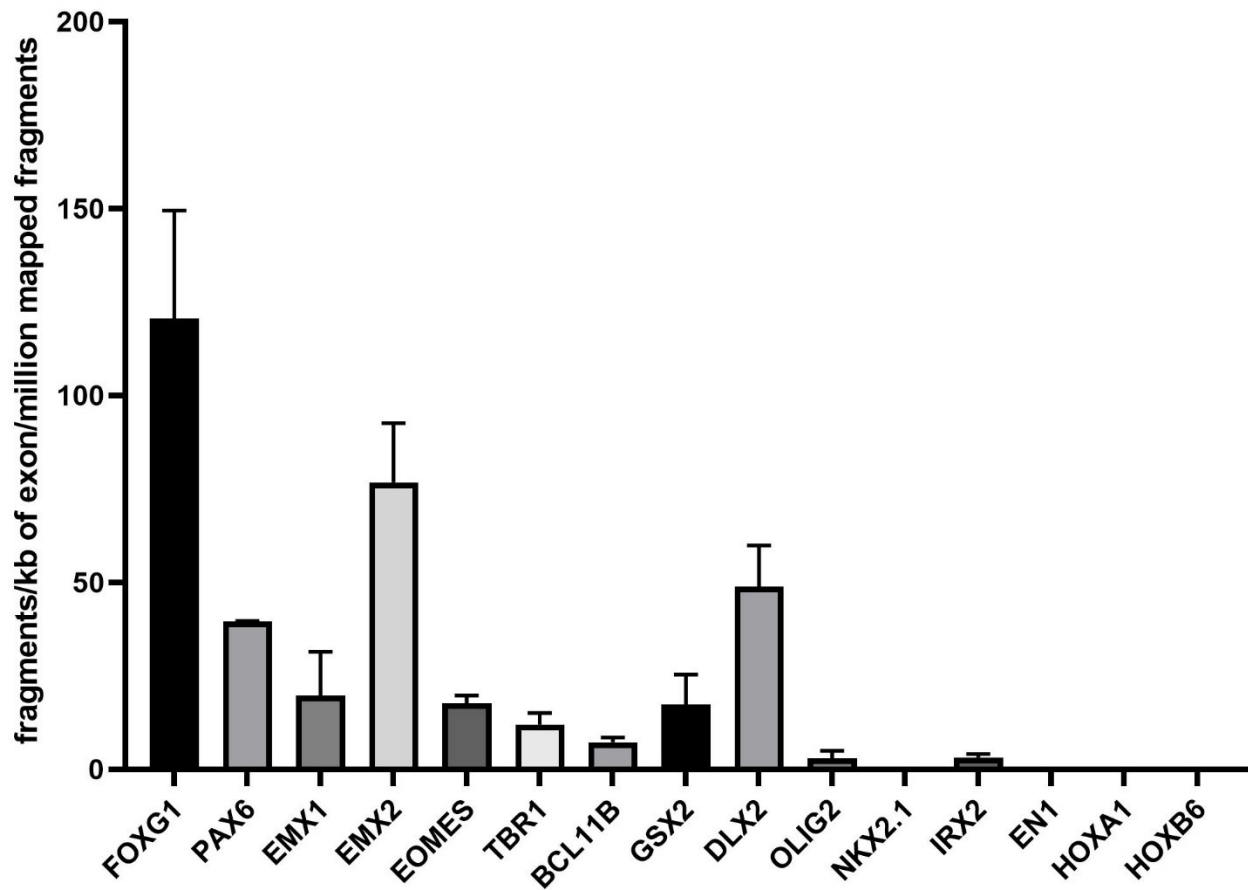

**Figure S4: Expression of region specific transcription factors in control organoids.** Related to Figure 3. The graph shows the number of read fragments normalized to exon length and to total number of reads for transcription factors characteristic of the telencephalon (FOXG1), dorsal telencephalon (PAX6, EMX1/2, EOMES, TBR1, BCL11B), ventral telencephalon (GSX2, DLX2, NKX2.1), diencephalon (IRX2), midbrain (EN1), hindbrain (HOXA1) and of the spinal cord (HOXB6). Data are presented as means  $\pm$  SD.

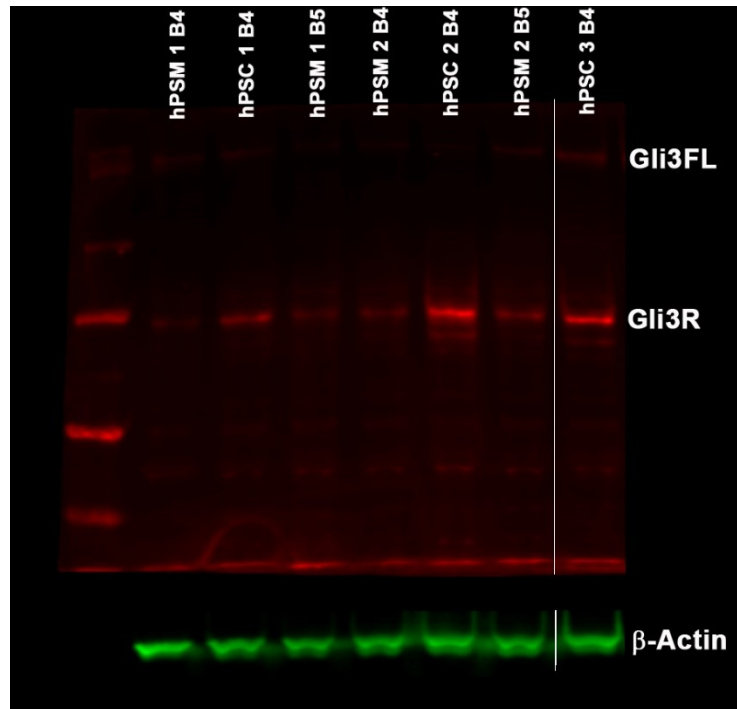

**Figure S5: GLI3 Western blot.** Related to Figure 3. Organoid tissue was derived from 3 control and 2 mutant lines. B4 and B5 indicate batch number.  $\beta$ -Actin served as a loading control. 2 lanes with protein extract from an additional mutant cell line that was not further analysed were removed from the gel between lane “hPSM2B5” and lane “hPSC3B4”.

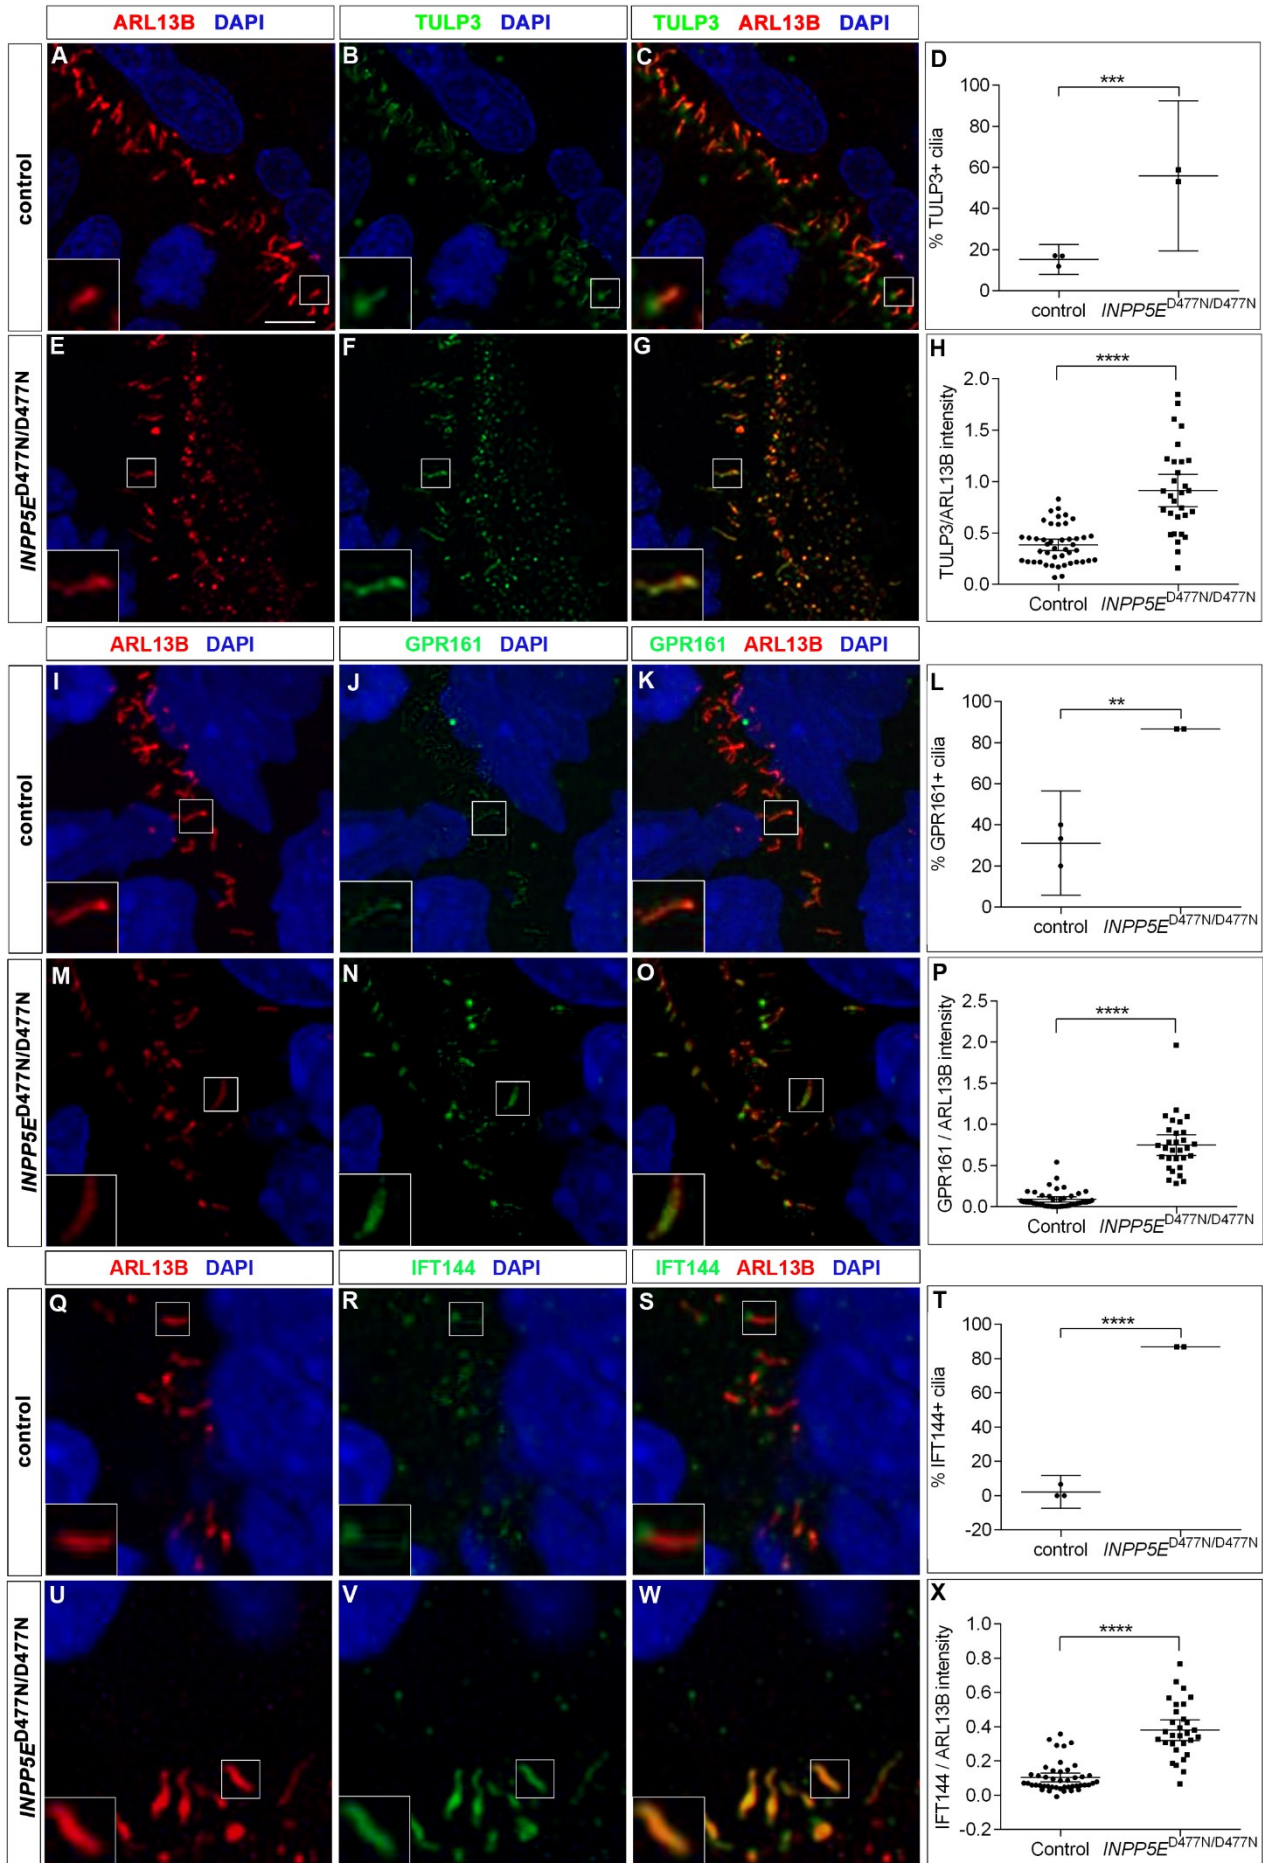



**Figure S6: Ciliary localization of TULP3, GPR161 and IFT144.** Related to Figures 5 and 6. (A-C, E-G, I-K, M-O, Q-S, U-W) Immunofluorescence analyses of TULP3, GPR161 and IFT144 ciliary expression in control (A-C, I-K and Q-S) and *INPP5E*<sup>D477N/D477N</sup> organoids (E-G, M-O, U-W). (D, H, L, P, T, X) Quantification of immunostainings. (A-H) TULP3 expression in the axoneme was up-regulated and found in most *INPP5E* mutant cilia but hardly in control cilia. (I-P) GPR161 was expressed at higher levels in almost all cilia in *INPP5E*<sup>D477N/D477N</sup> organoids. (Q-X) IFT144 accumulated in *INPP5E* mutant cilia. Statistical data are presented as means  $\pm$  95% confidence intervals (CI); unpaired t-tests (D, L, T), unpaired t-tests with Welch's correction (H) and Mann Whitney tests (P, X); n=3 (control) and n=2 (mutant) lines for (D, L, T); n = 45 (control) and n=30 (mutant) cilia from three and two different lines, respectively (H, P, X); \*\* p<0.01; \*\*\* p < 0.001; \*\*\*\* p<0.0001. Scale bar: 2.5  $\mu$ m.

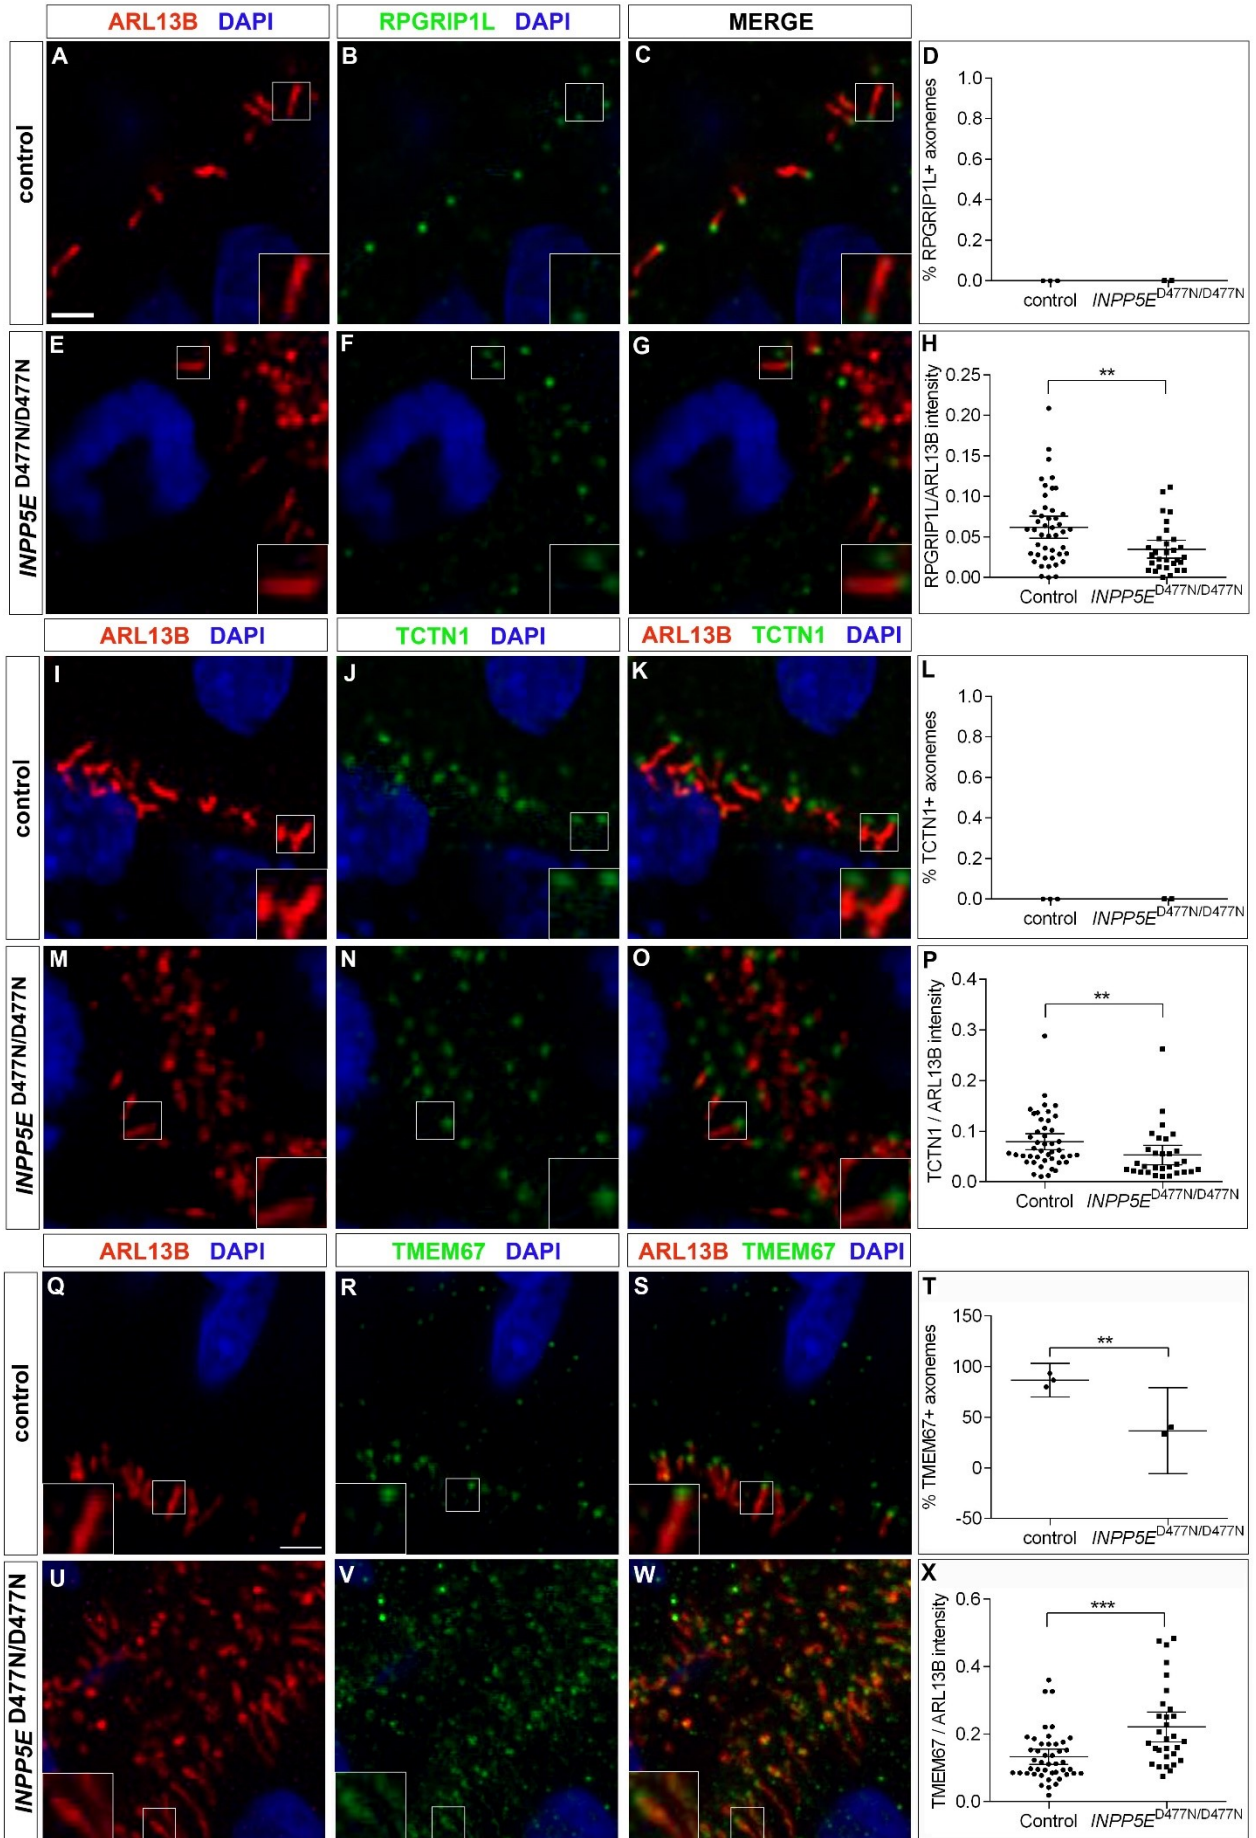

**Figure S7: Transition zone in *INPP5E*<sup>D477N/D477N</sup> organoids.** Related to Figures 5 and 6. (A-C, E-G, I-K, M-O, Q-S, U-W) Immunofluorescence analyses of RPGRIP1L, TCTN1 and TMEM67 ciliary expression in control (A-C, I-K and Q-S) and *INPP5E*<sup>D477N/D477N</sup> organoids (E-G, M-O, U-W). (A-P) RPGRIP1L (A-H) and TCTN1 (I-P) expression was mainly confined to the transition zone. Low levels of expression in the axoneme were further reduced in mutant cilia (Q-X) The proportion of cilia with TMEM67 expression at the transition zone was decreased while expression of TMEM67 in the ciliary axoneme was increased in mutant organoids.. Statistical data are presented as means  $\pm$  95% confidence intervals (CI); unpaired t-test (T), and Mann Whitney tests (H, P, X); n=3 (control) and n=2 (mutant) lines for (D, L, T); n = 45 (control) and n=30 (mutant) cilia from three and two different lines, respectively (H, P, X);; \*\* p < 0.01; \*\*\* p < 0.001. Scale bar: 2.5  $\mu$ m.

**Data S1: Karyotypic analyses. Related to STAR methods.**

**ANEUPLOIDY  
BOBS ASSAY**

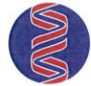

**TDL  
GENETICS**

**Genetics report**

The Halo Building, 1 Mabledon Place, London WC1H 9AX  
T: +44 (0)20 7307 7409 F: +44 (0)20 7307 7350  
E: [tdlgenetics@tdlpathology.com](mailto:tdlgenetics@tdlpathology.com) [www.tdlpathology.com](http://www.tdlpathology.com)

Patient Details:

Patient's Name : **GS8**  
Patient's D.O.B. : **NK**  
Dept. Ref. No. : **21G027545**  
Patient's Ref. No. : **GS8**  
Patient's Gender : **NK**  
Clinical Details : **Stem cell analysis**

Referred From: **University of Edinburgh**  
Referred By : **Karen Burr**  
Sample taken : **NK**  
Received : **21/12/21**  
Sample Type : **Extracted DNA**

Result:

**NO autosomal or sex chromosome aneuploidies were detected in this sample.**

Information:

The KaryoLite BoBs (BACs-on-Beads) Kit provided by Perkin Elmer has been used to analyse probes on both the p and q arms of chromosomes 1 to 22, X and Y (q arms in acrocentric chromosomes) to detect whole chromosome aneuploidy.

Triploidies and some mosaics will not be detected by this methodology.

Signed:   
Registered Clinical Scientist  
Dr L J Levett PhD (Director), Dr S Liddle PhD (Head of Genetics)  
E Holgado FRCPATH, C Lambert

Report Date: **30/12/21**

Checked:  Rep time (days): 9

Report produced by HSL Analytics (LLP) Page 1 of 1

**ANEUPLOIDY  
BOBS ASSAY**

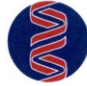

**TDL  
GENETICS**

Genetics report

The Halo Building, 1 Mabledon Place, London WC1H 9AX  
T: +44 (0)20 7307 7409 F: +44 (0)20 7307 7350  
E: [tdlgenetics@tdlpathology.com](mailto:tdlgenetics@tdlpathology.com) [www.tdlpathology.com](http://www.tdlpathology.com)

Patient Details:

Patient's Name : **CS02 P19**  
Patient's D.O.B. : **NK**  
Dept. Ref. No. : **21G024079**  
Patient's Ref. No.: **CS02 P19**  
Patient's Gender : **NK**  
Clinical Details : **Stem cell analysis**

Referred From: **University of Edinburgh**  
Referred By : **Karen Burr**  
Sample taken : **NK**  
Received : **09/11/21**  
Sample Type : **Extracted DNA**

Result:

**NO autosomal or sex chromosome aneuploidies were detected in this sample.**

Information:

The KaryoLite BoBs (BACs-on-Beads) Kit provided by Perkin Elmer has been used to analyse probes on both the p and q arms of chromosomes 1 to 22, X and Y (q arms in acrocentric chromosomes) to detect whole chromosome aneuploidy.

Triploidies and some mosaics will not be detected by this methodology.

Signed:

Registered Clinical Scientist

Dr L J Levett PhD (Director), Dr S Liddle PhD (Head of Genetics)  
E Holgado FRCPATH, C Lambert

Report Date: **11/11/21**

Checked: Rep time (days): 2

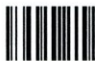

Report produced by HSL Analytics (LLP) Page 1 of 1

TAP3609/06-11-17V2

**ANEUPLOIDY  
BOBS ASSAY**

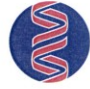

**TDL  
GENETICS**

**Genetics report**

The Halo Building, 1 Mabledon Place, London WC1H 9AX  
T: +44 (0)20 7307 7409 F: +44 (0)20 7307 7350  
E: tdlgenetics@tdlpathology.com www.tdlpathology.com

Patient Details:

Patient's Name : **CS25 18N6 P23**

Patient's D.O.B. : **NK**

Dept. Ref. No. : **21G027197**

Patient's Ref. No.: **CS25 18N6 P23**

Patient's Gender : **NK**

Clinical Details : **Stem cell analysis**

Referred From: **University of Edinburgh**

Referred By : **Karen Burr**

Sample taken : **15/12/21**

Received : **16/12/21**

Sample Type : **Extracted DNA**

Result:

**NO autosomal or sex chromosome aneuploidies were detected in this sample.**

Information:

The KaryoLite BoBs (BACs-on-Beads) Kit provided by Perkin Elmer has been used to analyse probes on both the p and q arms of chromosomes 1 to 22, X and Y (q arms in acrocentric chromosomes) to detect whole chromosome aneuploidy.

Triploidies and some mosaics will not be detected by this methodology.

Signed: 

**Registered Clinical Scientist**

Dr L J Levett PhD (Director), Dr S Liddle PhD (Head of Genetics)  
E Holgado FRCPATH, C Lambert

Report Date: **23/12/21**

Checked:  Rep time (days): 7

Report produced by HSL Analytics (LLP) Page 1 of 1

TAF3609/06-11-17V2

**ANEUPLOIDY  
BOBS ASSAY**

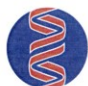

**TDL  
GENETICS**

Genetics report

The Halo Building, 1 Mabledon Place, London WC1H 9AX  
T: +44 (0)20 7307 7409 F: +44 (0)20 7307 7350  
E: tdlgenetics@tdlpathology.com www.tdlpathology.com

Patient Details:

Patient's Name : **1C2**  
Patient's D.O.B. : **NK**  
Dept. Ref. No. : **21G027542**  
Patient's Ref. No.: **1C2**  
Patient's Gender : **NK**  
Clinical Details : **Stem cell analysis**

Referred From: **University of Edinburgh**  
Referred By : **Karen Burr**  
Sample taken : **NK**  
Received : **21/12/21**  
Sample Type : **Extracted DNA**

Result:

**NO autosomal or sex chromosome aneuploidies were detected in this sample.**

Information:

The KaryoLite BoBs (BACs-on-Beads) Kit provided by Perkin Elmer has been used to analyse probes on both the p and q arms of chromosomes 1 to 22, X and Y (q arms in acrocentric chromosomes) to detect whole chromosome aneuploidy.

Triploidies and some mosaics will not be detected by this methodology.

Signed: 

Registered Clinical Scientist  
Dr L J Levett PhD (Director), Dr S Liddle PhD (Head of Genetics)  
E Holgado FRCPATH, C Lambert

Report Date: **30/12/21**

Checked:  Rep time (days): 9

Report produced by HSL Analytics (LLP) Page 1 of 1

**ANEUPLOIDY  
BOBS ASSAY**

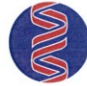

**TDL  
GENETICS**

Genetics report

The Halo Building, 1 Mabledon Place, London WC1H 9AX  
T: +44 (0)20 7307 7409 F: +44 (0)20 7307 7350  
E: [tdlgenetics@tdlpathology.com](mailto:tdlgenetics@tdlpathology.com) [www.tdlpathology.com](http://www.tdlpathology.com)

Patient Details:

|                                              |                                               |
|----------------------------------------------|-----------------------------------------------|
| Patient's Name : <b>2A6</b>                  | Referred From: <b>University of Edinburgh</b> |
| Patient's D.O.B. : <b>NK</b>                 | Referred By : <b>Karen Burr</b>               |
| Dept. Ref. No. : <b>21G027543</b>            | Sample taken : <b>NK</b>                      |
| Patient's Ref. No.: <b>2A6</b>               | Received : <b>21/12/21</b>                    |
| Patient's Gender : <b>NK</b>                 | Sample Type : <b>Extracted DNA</b>            |
| Clinical Details : <b>Stem cell analysis</b> |                                               |

Result:

**NO autosomal or sex chromosome aneuploidies were detected in this sample.**

Information:

The KaryoLite BoBs (BACs-on-Beads) Kit provided by Perkin Elmer has been used to analyse probes on both the p and q arms of chromosomes 1 to 22, X and Y (q arms in acrocentric chromosomes) to detect whole chromosome aneuploidy.

Triploidies and some mosaics will not be detected by this methodology.

Signed:

Registered Clinical Scientist

Dr L J Levett PhD (Director), Dr S Liddle PhD (Head of Genetics)  
E Holgado FRCPATH, C Lambert

Report Date: **30/12/21**

Checked: Rep time (days): 9

Report produced by HSL Analytics (LLP) Page 1 of 1



**Table S1: Oligonucleotides used in this study.** Related to Figures 3 and S1.

|                                                        |                                                                                                                                                                                                   |                              |
|--------------------------------------------------------|---------------------------------------------------------------------------------------------------------------------------------------------------------------------------------------------------|------------------------------|
| <b>INPP5E D477N ssODN</b>                              | GCCGCAGCGGACGTCACCACCCGCTTCGA<br>TGAGGTGTTCTGGTTTGGAAATTTCAACTTC<br>AGGCTGAGTGGCGGGCGCACAGTCGTGGA<br>ACGCCCTCCTGTGCCAGGGCCTGGTGGTG<br>GACGTGCCGGCGCTGCTGCAGCACGACCA<br>GCTCATCCGGGAGATGCCGAAAGGTG |                              |
| <b>sgRNA</b>                                           | CTGTGCGCCCCGCCACTCAGG                                                                                                                                                                             |                              |
| <b>INPP5E primers flanking the D477N mutation site</b> |                                                                                                                                                                                                   |                              |
| Inp D447N Fw                                           | GCGGTTCTTTAGCACGGTTA                                                                                                                                                                              |                              |
| Inp D447N Rev                                          | CTCCTCATCTCCCTCCATG                                                                                                                                                                               |                              |
|                                                        |                                                                                                                                                                                                   |                              |
| <b>Off-targets</b>                                     |                                                                                                                                                                                                   |                              |
| chr2-NM_018218_Fw                                      | ATGGAAAACCTGAAGGCCTGC                                                                                                                                                                             |                              |
| chr2-NM_018218_Rev                                     | TGCTGTTGTGTCCCTTGTTG                                                                                                                                                                              |                              |
| Chr11-119597300_Fw                                     | AGCTTCCAGGAACCCTTCAA                                                                                                                                                                              |                              |
| Chr11-119597300_Rev                                    | GCACAACCATATCCACCTGC                                                                                                                                                                              |                              |
| Chr11+70329062_Fw                                      | TTGTGTCATAGGTGTGGGCT                                                                                                                                                                              |                              |
| Chr11+70329062_Rev                                     | GGAAGGAGCTGGAAGGGAAT                                                                                                                                                                              |                              |
| Chr16+606525_Fw                                        | TATGAGGCATCGCTGTCAGA                                                                                                                                                                              |                              |
| Chr16+606525_Rev                                       | GGCTGGGATGTAGACTGACA                                                                                                                                                                              |                              |
| Chr1+134123771_NM_052896_Fw                            | ATGGAAGGTTCTGGAGCACA                                                                                                                                                                              |                              |
| Chr1+134123771_NM_052896_Rev                           | GTGGTGGAGGCAGTGATAGT                                                                                                                                                                              |                              |
| Chr7+151162603_Fw                                      | ATTGTGCCATTGTGCTCCAG                                                                                                                                                                              |                              |
| Chr7+151162603_Rev                                     | CTCACTGCAGCCTCAAACCTC                                                                                                                                                                             |                              |
|                                                        |                                                                                                                                                                                                   |                              |
| <b>In situ hybridization</b>                           |                                                                                                                                                                                                   |                              |
| GLI1 fw                                                | TGGACTTTGATTCCCCACCC                                                                                                                                                                              |                              |
| GLI1 rev                                               | ATACATAGCCCCAGCCATAC                                                                                                                                                                              |                              |
| PTCH1 fw                                               | GGTCTGCCATCCTAACACCC                                                                                                                                                                              |                              |
| PTCH1 rev                                              | CATGCTAGGTCGCCAATGGT                                                                                                                                                                              |                              |
|                                                        |                                                                                                                                                                                                   |                              |
| <b>qRT-PCR</b>                                         |                                                                                                                                                                                                   | <b>length of PCR product</b> |
| hATP5 F2                                               | GTCCAGGGGTATTGCAGGC                                                                                                                                                                               | 112bp                        |
| hATP5 R2                                               | TCAGGGATCAGTCCATAACGA                                                                                                                                                                             |                              |
|                                                        |                                                                                                                                                                                                   |                              |
| hGLI1 F2                                               | TACATGTGTGAGCACGAGGG                                                                                                                                                                              | 153bp                        |
| hGLI1 R2                                               | TTTTCGCAGCGAGCTAGGAT                                                                                                                                                                              |                              |

|                           |                               |                   |
|---------------------------|-------------------------------|-------------------|
|                           |                               |                   |
| hPTCH1 F2                 | TGGTTCATCAGAGTGTGCGCA         | 143bp             |
| hPTCH1 R2                 | GGCATAGGCGAGCATGAGTAA         |                   |
|                           |                               |                   |
|                           |                               |                   |
| <b>PCR efficiency</b>     |                               |                   |
|                           |                               |                   |
| <b>Primer combination</b> |                               | <b>efficiency</b> |
|                           |                               |                   |
| ATP5                      | $y=-0.29x + 9.66, R^2=0.997$  | 94.98%            |
| PTCH1                     | $y=-0.29x + 10.31, R^2=0.991$ | 94.98%            |
|                           |                               |                   |
| ATP5                      | $y=-0.30x + 10.12, R^2=0.997$ | 99.53%            |
| GLI1                      | $y=-0.30x + 10.90, R^2=0.991$ | 99.53%            |

**Table S2:** Summary of organoid batches used in this study. Related to STAR Methods.

| <b>experiment</b>  | <b>hPSC1</b> | <b>hPSC2</b> | <b>hPSC3</b> | <b>hPSM1</b> | <b>hPSM2</b> |
|--------------------|--------------|--------------|--------------|--------------|--------------|
| Figure 2           | Batch 1      | Batch 3      | Batch 3      | Batch 1      | Batch 1      |
| Figure 3           | Batch 1-3    | Batch 2, 3   | Batch 2, 3   | Batch 1-3    | Batch 1-3    |
| Figure 4           | Batch 1-3    | Batch 2, 3   | Batch 2, 3   | Batch 1-3    | Batch 1-3    |
| Figure 5A, B       | Batch 4      | Batch 4      | Batch 4      | Batch 4      | Batch 4      |
| Figure 5C, D, F, G | Batch 1      | Batch 2      | Batch 2      | Batch 1      | Batch 1      |
| Figure 5E, H-L     | Batch 4      | Batch 4      | Batch 4      | Batch 4, 5   | Batch 4, 5   |
| Figure 6           | Batch 2, 3   | Batch 2, 3   | Batch 2, 3   | Batch 2, 3   | Batch 2, 3   |
| Figure 7           | Batch 1, 2   | Batch 2, 3   | Batch 2, 3   | Batch 1, 2   | Batch 1, 2   |
| Figure 8           | Batch 1, 2   | Batch 2, 3   | Batch 2, 3   | Batch 1, 2   | Batch 1, 2   |
| Figure 9           | Batch 1, 2   | Batch 2, 3   | Batch 2, 3   | Batch 1, 2   | Batch 1, 2   |
| Figure 10          | Batch 1, 2   | Batch 2, 3   | Batch 2, 3   | Batch 1, 2   | Batch 1, 2   |
